# Supplementary material
Source: Springer Nature journal article supplement (https://www.springermedizin.de/resource/supplementary/12885_2009_1519_MOESM2_ESM.pdf/9472222)

**A**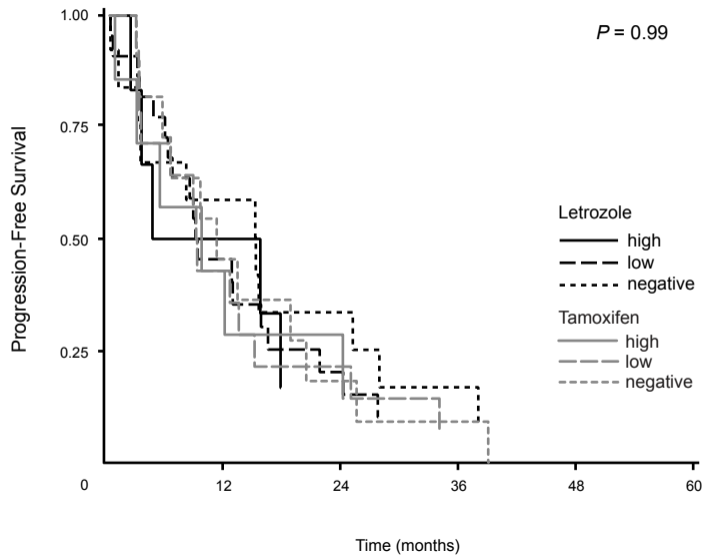**B**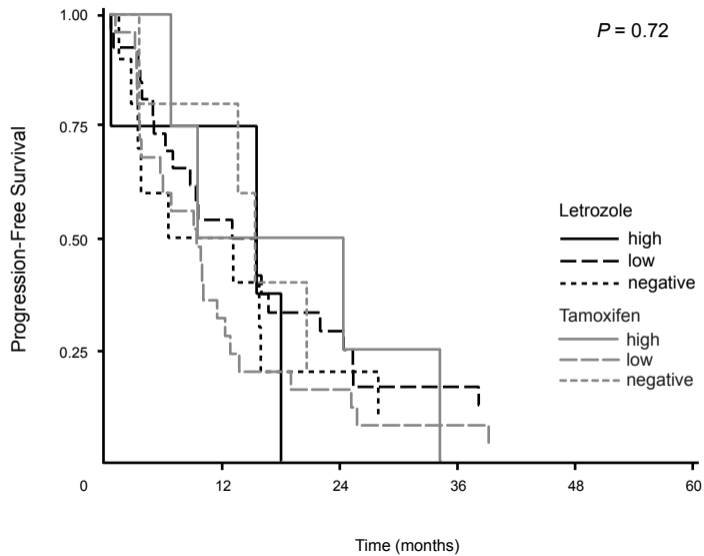

Supplement: MOESM2 [file 9472222]
